# Supplementary material for: Architecture and evolution of the cis-regulatory system of the echinoderm kirrelL gene
Source: eLife. 2022 Feb 25;11:e72834. doi: 10.7554/eLife.72834 (PMC8903837; doi:10.7554/eLife.72834)
Supplement: Figure 5—source data 2. [file elife-72834-fig5-data2.xlsx]

## Sheet: Sheet1
Tag	Gene	Target Sequence
RNA	GFP	TGGTCACTACCTTCACCTATGGCGTGCAGTGCTTTTCCAGATACCCAGACCATATGAAGCAGCATGACTTTTTCAAGAGCGCCATGCCCGAGGGCTATGT
RNA	RFP	ATGGCCATCATCAAGGAGTTCATGCGCTTCAAGGTGCACATGGAGGGCTCCGTGAACGGCCACGAGTTCGAGATCGAGGGCGAGGGCGAGGGCCGCCCCT
RNA	foxJ1	CAGCCCGTCATGGAAATCCCAAAGATAGAACCCAAAGAAGACAATCTGGACGACAGTCTGACGAGTCTGAACTGGTTGCAGAACCTTCGCATCATGCGCA
RNA	hlf	GGCGCGTTAAAGAAAACCAAATTGTTATCCGGGCATCCTACTTGGGAAAAGAGAATAGCGCTCTCAGGGATGATGTCTTAGAATTGAAGAAGGAAAACTC
RNA	kazL	CTCAGGCTTGCCATCGACCAGAACAAAGTGCCTAGTGATTGCAAATTTCCCAAAGCAGCTGATCTTGACCATTGCTGGGTAGCCAGGACGTGGTTGAATG
RNA	rasgrp3	GGTTACATCACATACACTGAGTTCCAGAGTATAGCGACCAGCAACTTCCCCTTCATGGGCTCATTCTGTGTGCTGGATGCAGATCGGGATGGCCTGATCA
DNA	GFP	TCGGCCAGCTGCACGGATCCATCCTCAATGTTGTGTCTGATCTTGAAGTTGACCTTGATGCCATTCTTTTGCTTGTCGGCCATGATGTACACATTGTGGG
DNA	RFP	CGGCGCGTTCGTACTGTTCCACGATGGTGTAGTCCTCGTTGTGGGAGGTGATGTCCAACTTGATGTTGACGTTGTAGGCGCCGGGCAGCTGCACGGGCTT
DNA	hypp_1164	TTAACCATGTCTATCGGTCTCTTTAGAGCAGCTACTACATGAGGAGGGATCCAGGTTGGGACACTCTTCGGATACCGCTTGGTTTTTATCAAGAATATAA
DNA	hypp_1901	TAATGTGATTGGAGCATTTTAAGTTTATCCTGAGATTGGTTGTCTATGAATCAATTTAAAAGTTCCCATTGATATAATGACTACCGGGGAGTTTCTAGAA
DNA	hypp_2956	ATTTTCGCGGTTCTGTAAACACAGGACTTGATGCCCTGCAAGTAAAATTCACTCCGTTGTCGTCCCCACTGAGAGTCTTATTGTAAGTTATCGTATTCGT
DNA	hypp_592	GGCTTTCCTAGAACATTGCCATTCAGACTCACAACTGTAGTGCTATTTGATACCGTCCAACCATTGTTAGACAACTCGCACACAATCTCTACATCAATAT
DNA	kirrelL	TAAAGCACTACTGGTCGCTTCACAGATGAAGGTGACTCCATTATCTCCTGGTGTAAGTATCCTCCTGTAGACATTAGTATGCTTGGTAGCATGGGACACT
DNA	pmar1	TCTAGAGGTTGACGTAGAAGACGTACGGATGATAACCCATCGGTGTGGAGAATGAAGACGGTGTGCGGTAAAGATGCTCTGCGTTATACCTGGATGTAGA
