# Supplementary material for: Architecture and evolution of the cis-regulatory system of the echinoderm kirrelL gene
Source: eLife. 2022 Feb 25;11:e72834. doi: 10.7554/eLife.72834 (PMC8903837; doi:10.7554/eLife.72834)
Supplement: Figure 6—source data 1. [file elife-72834-fig6-data1.xlsx]

## Sheet: Sheet1
Species	CRE	Length	Genome version	Coordinates	Reference
Strongylocentrotus purpuratus (Sp)	A	1654	3.1	Scaffold8:559705-561358	Arshinoff et al., 2021
			5	NW_022145615.1:1967648-1969297
	B	1338	3.1	Scaffold8:561359-562694
			5	NW_022145615.1:1966309-1967647
	C	1206	3.1	Scaffold8:562695-563900
			5	NW_022145615.1:1965102-1966308
	D	1244	3.1	Scaffold8:563901-565145
			5	NW_022145615.1:1963858-1965101
	E	1168	3.1	Scaffold8:565146-566314
			5	NW_022145615.1:1962771-1963857
	F	1503	3.1	Scaffold8:566315-567737
			5	NW_022145615.1:1961255-1962770
	G	1074	3.1	Scaffold8:567738-568809
			5	NW_022145615.1:1960194-1961254
	H	1995	3.1	Scaffold8:570447-572441
			5	NW_022145615.1:1956564-1958558
	I	2338	3.1	Scaffold8:572450-574778
			5	NW_022145615.1:1954217-1956555
Eucidaris tribuloides (Et)	Upstream of ATG start site	1765	1	Scaffold143859:35325-37089
Parastichopus parvimensis (Pp)	Upstream of ATG start site	1966	1	Scaffold513:146377-148342
Patiria miniata (Pm)	Upstream of ATG start site	2147	2	Scaffold13741:5496-7644
			3	NW_024037072.1:11662007-11664154
Acanthaster planci (Aplc)	Upstream of ATG start site	2191	1	NW_019091361.1:1504723-1506913
Anneissia japonica (Aj)	Upstream of ATG start site	895	1	NW_022748342.1:848024-848918
Ophionereis fasciata (Of)	Upstream of ATG start site	1068	0.02	Ofas.g02.0091550:1-1068	Long et al., 2016
